# Supplementary material for: Wearable sensor-based quantitative gait analysis in Parkinson’s disease patients with different motor subtypes
Source: Springer Nature journal article supplement (doi:10.1038/s41746-024-01163-z), 2024-06-26
Supplement: 41746_2024_1163_MOESM1_ESM.pdf [file 41746_2024_1163_MOESM1_ESM.pdf]

## **Supplementary Materials for**

### ***Wearable sensor-based quantitative gait analysis in Parkinson's disease patients with different motor subtypes***

Supplementary Table 1. Discriminative value of gait characteristics<sup>a</sup> for early diagnosis in PD subtypes and subtype differentiation.

Supplementary Table 2. Description of the gait features extracted from the TUG test using the wearable sensors.

**Supplementary Table 1. Discriminative value of gait characteristics<sup>a</sup> for early diagnosis in PD subtypes and subtype differentiation.**

| Gait parameters                                | HC vs. TD |             |          | HC vs. PIGD |             |          | TD vs. PIGD |             |          |
|------------------------------------------------|-----------|-------------|----------|-------------|-------------|----------|-------------|-------------|----------|
|                                                | AUC       | 95% CI      | <i>p</i> | AUC         | 95% CI      | <i>p</i> | AUC         | 95% CI      | <i>p</i> |
| <b>Lower body related parameters</b>           |           |             |          |             |             |          |             |             |          |
| MAS Swing (%)                                  | 0.713     | 0.571~0.856 | 0.005    | 0.704       | 0.554~0.855 | 0.012    |             |             |          |
| MAS Stance (%)                                 | 0.713     | 0.571~0.856 | 0.005    | 0.704       | 0.554~0.855 | 0.012    |             |             |          |
| MAS Shank Backward Swing Maximum (°)           | 0.81*     | 0.698~0.923 | <0.001   | 0.779       | 0.654~0.903 | 0.001    |             |             |          |
| LAS Shank Backward Swing Maximum (°)           | 0.845*    | 0.747~0.943 | <0.001   | 0.825*      | 0.714~0.935 | <0.001   |             |             |          |
| MAS Peak Shank Angular Velocity (°/s)          | 0.705     | 0.576~0.833 | 0.007    |             |             |          |             |             |          |
| Shank Symbolic Symmetry Index (%)              | 0.683     | 0.537~0.83  | 0.017    |             |             |          |             |             |          |
| <b>Trunk and lumbar related parameters</b>     |           |             |          |             |             |          |             |             |          |
| Trunk Coronal Peak Velocity (°/s)              |           |             |          | 0.722       | 0.579~0.865 | 0.006    |             |             |          |
| Trunk Coronal RoM (°)                          | 0.716     | 0.581~0.851 | 0.004    | 0.864*      | 0.769~0.96  | <0.001   |             |             |          |
| Trunk Sagittal Peak Velocity (°/s)             |           |             |          | 0.731       | 0.577~0.886 | 0.004    |             |             |          |
| Trunk Transverse Peak Velocity (°/s)           |           |             |          | 0.702       | 0.546~0.857 | 0.013    |             |             |          |
| Lumbar Coronal RoM (°)                         | 0.871*    | 0.785~0.956 | <0.001   | 0.796       | 0.662~0.93  | <0.001   |             |             |          |
| Lumbar Sagittal Peak Velocity (°/s)            |           |             |          | 0.703       | 0.558~0.849 | 0.013    |             |             |          |
| <b>Upper body related parameters</b>           |           |             |          |             |             |          |             |             |          |
| MAS Arm Peak Velocity (°/s)                    |           |             |          | 0.835*      | 0.717~0.954 | <0.001   | 0.792       | 0.656~0.927 | <0.001   |
| LAS Arm Peak Velocity (°/s)                    |           |             |          | 0.715       | 0.567~0.863 | 0.008    | 0.757       | 0.599~0.914 | 0.001    |
| MAS Arm Backward Swing Maximum (°)             | 0.871*    | 0.783~0.959 | <0.001   | 0.879*      | 0.78~0.977  | <0.001   |             |             |          |
| LAS Arm Backward Swing Maximum (°)             |           |             |          | 0.745       | 0.613~0.877 | 0.003    |             |             |          |
| Arm Velocity Asymmetry (%)                     | 0.716     | 0.57~0.862  | 0.005    |             |             |          |             |             |          |
| Arm Symbolic Symmetry Index (%)                | 0.868*    | 0.757~0.979 | <0.001   | 0.762       | 0.622~0.903 | 0.001    |             |             |          |
| <b>Postural transitions related parameters</b> |           |             |          |             |             |          |             |             |          |
| Turning - Average Duration (s)                 | 0.735     | 0.613~0.857 | 0.002    | 0.797       | 0.673~0.921 | <0.001   |             |             |          |

|                                           |        |             |        |        |             |        |       |             |       |
|-------------------------------------------|--------|-------------|--------|--------|-------------|--------|-------|-------------|-------|
| Turning - Peak Velocity (°/s)             |        |             |        | 0.802* | 0.673~0.93  | <0.001 |       |             |       |
| Turning - Average Angular Velocity (°/s)  | 0.74   | 0.619~0.862 | 0.002  | 0.799  | 0.676~0.922 | <0.001 |       |             |       |
| Turning - Average Steps                   | 0.749  | 0.622~0.877 | 0.001  |        |             |        |       |             |       |
| Turning - Average Step Duration (s)       |        |             |        |        |             |        | 0.736 | 0.587~0.886 | 0.002 |
| SiSt - Trunk Sagittal Peak Velocity (°/s) | 0.816* | 0.712~0.92  | <0.001 | 0.794  | 0.661~0.926 | <0.001 |       |             |       |
| SiSt - Trunk Lean Backward Maximum (°)    | 0.705  | 0.569~0.84  | 0.007  |        |             |        |       |             |       |
| StSi - Duration (s)                       | 0.786  | 0.667~0.905 | <0.001 |        |             |        |       |             |       |
| StSi - Trunk Sagittal Peak Velocity (°/s) | 0.709  | 0.58~0.839  | 0.006  | 0.731  | 0.594~0.867 | 0.004  |       |             |       |
| StSi- Trunk Lean Backward Maximum (°)     | 0.789  | 0.674~0.905 | <0.001 | 0.744  | 0.61~0.878  | 0.002  |       |             |       |

PD, Parkinson's disease; AUC, area under the curve; CI, confidence interval; HC, healthy controls; TD, tremor-dominant; PIGD, postural instability and gait disorder; MAS, more affected side; LAS, less affected side; RoM, range of motion; SiSt, sit to stand; StSi, stand to sit. a: gait variables with significant Kruskal Wallis test and the corresponding pair-wise comparison.\*: discriminative parameters with an AUC >0.8.

**Supplementary Table 2. Description of the gait features extracted from the TUG test using the wearable sensors.**

| Gait parameters                      | Components | M.U.  | Description                                                                                                                                                                                                                                                                                                                                                                               |
|--------------------------------------|------------|-------|-------------------------------------------------------------------------------------------------------------------------------------------------------------------------------------------------------------------------------------------------------------------------------------------------------------------------------------------------------------------------------------------|
| <b>Lower body related parameters</b> |            |       |                                                                                                                                                                                                                                                                                                                                                                                           |
| Step Length                          | Gait       | [cm]  | <p>The straight-line distance from the opposite heel to the ipsilateral heel in a Gait Cycle at the time when the unilateral heel strikes ground.</p> $steplen = \text{len}(hs\_A - hs\_B)$ <p><i>steplen</i>: Step Length<br/> <i>len</i>: Indicates finding the length of two positions<br/> <i>hs_A</i>: A side heel strike position<br/> <i>hs_B</i>: B side heel strike position</p> |
| Stride Velocity                      | Gait       | [m/s] | <p>The ratio of Stride Length to its corresponding ipsilateral Gait Cycle Duration.</p> $stide\_v = stide\_len / (t5 - t1)$ <p><i>stide_v</i>: Stride Velocity<br/> <i>stide_len</i>: Stride length<br/> <i>t1</i>: First ground contact moment in the gait cycle(s)<br/> <i>t2</i>: Last ground contact moment in the gait cycle(s)</p>                                                  |
| Stride Length                        | Gait       | [cm]  | <p>The straight-line distance between a pair of successive ipsilateral heel-striking events.</p> $stride\_len = stepL + stepR$ <p><i>stride_len</i>: Stride Length<br/> <i>stepL</i>: Left step length<br/> <i>stepR</i>: Right step length</p>                                                                                                                                           |

|                 |      |            |                                                                                                                                                                                                                                                                                                                                                                                                                                                                                                                                                                |
|-----------------|------|------------|----------------------------------------------------------------------------------------------------------------------------------------------------------------------------------------------------------------------------------------------------------------------------------------------------------------------------------------------------------------------------------------------------------------------------------------------------------------------------------------------------------------------------------------------------------------|
| Gait Cycle time | Gait | [s]        | <p>The time interval between two successive ipsilateral heel-striking events.<br/> <math>GaitCycle = t5 - t1</math><br/> <i>GaitCycle</i>: Gait cycle time<br/> <i>t1</i>: First ground contact moment in the gait cycle(s)<br/> <i>t5</i>: Last ground contact moment in the gait cycle(s)</p>                                                                                                                                                                                                                                                                |
| Cadence         | Gait | [step/min] | <p>The number of steps taken in a minute.<br/> <math>Cadence = 60 / (t1 - t2)</math><br/> <i>Cadence</i>: Cadence<br/> <i>t1</i>: A side ground contact moment in the gait cycle(s)<br/> <i>t2</i>: B side ground contact moment in the gait cycle(s)</p>                                                                                                                                                                                                                                                                                                      |
| Double Support  | Gait | [%]        | <p>The ratio of the double support phase duration to its corresponding ipsilateral Gait Cycle Duration.<br/> <math>double\_s = 100 * (t2 - t1 + t4 - t3) / (t5 - t1)</math><br/> <i>double_s</i>: Double support phase<br/> <i>t1</i>: A side ground contact moment in the gait cycle(s)<br/> <i>t2</i>: B side ground lift moment in the gait cycle(s)<br/> <i>t3</i>: B side ground contact moment in the gait cycle(s)<br/> <i>t4</i>: A side ground lift moment in the gait cycle(s)<br/> <i>t5</i>: A side ground contact moment in the gait cycle(s)</p> |
| Swing           | Gait | [%]        | <p>The ratio of the period, during which the unilateral limb is unconnected with the ground, to its corresponding ipsilateral Gait Cycle.<br/> <math>swing = 1 - st</math><br/> <i>swing</i>: Swing phase<br/> <i>st</i>: Support phase</p>                                                                                                                                                                                                                                                                                                                    |

|                              |      |     |                                                                                                                                                                                                                                                                                                                                                                                                                          |
|------------------------------|------|-----|--------------------------------------------------------------------------------------------------------------------------------------------------------------------------------------------------------------------------------------------------------------------------------------------------------------------------------------------------------------------------------------------------------------------------|
| Stance                       | Gait | [%] | <p>The ratio of the unilateral stance phase duration to its corresponding ipsilateral Gait Cycle Duration.</p> $st = 100 * (t4 - t1) / (t5 - t1)$ <p><i>st</i> : Support phase<br/> <i>t1</i> : A side ground contact moment in the gait cycle(s)<br/> <i>t4</i> : A side ground lift moment in the gait cycle(s)<br/> <i>t5</i> : A side ground contact moment in the gait cycle(s)</p>                                 |
| Shank Forward Swing Maximum  | Gait | [°] | <p>The maximum angle value of the unilateral shank forward swings in a Gait Cycle.</p> $shank\_angle\_max = \max(shank\_pit(t1:t5))$ <p><i>max</i> : Find the maximum value<br/> <i>shank_angle_max</i> : Shank Forward Swing Maximum<br/> <i>shank_pit</i> : Shank swing angle<br/> <i>t1</i> : First ground contact moment in the gait cycle(s)<br/> <i>t5</i> : Last ground contact moment in the gait cycle(s)</p>   |
| Shank Backward Swing Maximum | Gait | [°] | <p>The maximum angle value of the unilateral shank backward swings in a Gait Cycle.</p> $shank\_angle\_min = \min(shank\_pit(t1:t5))$ <p><i>min</i> : Find the minimum value<br/> <i>shank_angle_min</i> : Shank Backward Swing Maximum<br/> <i>shank_pit</i> : Shank swing angle<br/> <i>t1</i> : First ground contact moment in the gait cycle(s)<br/> <i>t5</i> : Last ground contact moment in the gait cycle(s)</p> |

|                                |      |       |                                                                                                                                                                                                                                                                                                                                                                                                                                                                                         |
|--------------------------------|------|-------|-----------------------------------------------------------------------------------------------------------------------------------------------------------------------------------------------------------------------------------------------------------------------------------------------------------------------------------------------------------------------------------------------------------------------------------------------------------------------------------------|
| Peak Shank<br>Angular Velocity | Gait | [°/s] | <p>The maximum angular velocity value of the unilateral shank swings in a Gait Cycle.<br/> <math>shank\_angle\_vel\_max = \max(abs(shank\_gyro(t1:t5)))</math><br/> max : Find the maximum value<br/> <math>shank\_angle\_vel\_max</math> : Peak Shank Angular Velocity<br/> <math>shank\_gyro</math> : Shank swing angular velocity<br/> <math>t1</math> : First ground contact moment in the gait cycle(s)<br/> <math>t5</math> : Last ground contact moment in the gait cycle(s)</p> |
| Stride Velocity<br>Asymmetry   | Gait | [%]   | <p>Difference in stride velocity between the left and right limb divided by the larger value.<br/> <math>stride\_vel\_asym = 100 * abs(stride\_v\_L - stride\_v\_R) / \max([stride\_v\_L \ stride\_v\_R])</math><br/> abs : Get the absolute value<br/> max : Find the maximum value<br/> <math>stride\_vel\_asym</math> : Stride Velocity Asymmetry<br/> <math>stride\_v\_L</math> : Left stride speed<br/> <math>stride\_v\_R</math> : Right stride speed</p>                         |
| Stride Length<br>Asymmetry     | Gait | [%]   | <p>Difference in stride length between the left and right limb divided by the larger value.<br/> <math>stride\_len\_asym = 100 * abs(stride\_lenL - stride\_lenR) / \max([stride\_lenL \ stride\_lenR])</math><br/> abs : Get the absolute value<br/> max : Find the maximum value<br/> <math>stride\_len\_asym</math> : Stride Length Asymmetry<br/> <math>stride\_lenL</math> : Left stride length<br/> <math>stride\_lenR</math> : Right stride length</p>                           |

|                  |             |     |                                                                                                                                                                                                                                                                                                                                                                                                                           |
|------------------|-------------|-----|---------------------------------------------------------------------------------------------------------------------------------------------------------------------------------------------------------------------------------------------------------------------------------------------------------------------------------------------------------------------------------------------------------------------------|
| Swing Asymmetry  | Gait        | [%] | <p>Difference in swing phase between the left and right limb divided by the larger value.<br/> <math>swing\_asym=100 * abs(swing\_L - swing\_R) / max([swing\_L swing\_R])</math><br/> <i>abs</i> : Get the absolute value<br/> <i>max</i> : Find the maximum value<br/> <i>swing_asym</i> : Swing Asymmetry<br/> <i>swing_L</i> : Left swing phase<br/> <i>swing_R</i> : Right swing phase</p>                           |
| Stance Asymmetry | Gait        | [%] | <p>Difference in stance phase between the left and right limb divided by the larger value.<br/> <math>st\_asym=100 * abs(st\_L - st\_R) / max([st\_L st\_R])</math><br/> <i>abs</i> : Get the absolute value<br/> <i>max</i> : Find the maximum value<br/> <i>st_asym</i> : Stance Asymmetry<br/> <i>st_L</i> : Left support phase<br/> <i>st_R</i> : Right support phase</p>                                             |
| Shank Asymmetry  | RoM<br>Gait | [%] | <p>Difference in range of motion between the left and right shank divided by the larger value.<br/> <math>ShangkRomAsym=100 * abs(scope\_L - scope\_R) / max([scope\_L scope\_R])</math><br/> <i>abs</i> : Get the absolute value<br/> <i>max</i> : Find the maximum value<br/> <i>ShangkRomAsym</i> : Shank RoM Asymmetry<br/> <i>scope_L</i> : Left shank angle range<br/> <i>scope_R</i> : Right shank angle range</p> |



|                                             |      |     |                                                                                                                                                                                                                                                                                                                                                                                                                                                                     |
|---------------------------------------------|------|-----|---------------------------------------------------------------------------------------------------------------------------------------------------------------------------------------------------------------------------------------------------------------------------------------------------------------------------------------------------------------------------------------------------------------------------------------------------------------------|
| Peak Shank<br>Angular Velocity<br>Asymmetry | Gait | [%] | <p>Difference in peak angular velocity between the left and right shank divided by the larger value.<br/> <math>PeakshankAngVelAsym = 100 * \text{abs}(w\_L - w\_R) / \text{max}([w\_L w\_R])</math></p> <p>abs : Get the absolute value<br/> max : Find the maximum value<br/> <i>PeakshankAngVelAsym</i> : Peak Shank Angular Velocity Asymmetry<br/> <i>w_L</i> : Peak angular velocity of left shank<br/> <i>w_R</i> : Peak angular velocity of right shank</p> |
| Shank Symbolic<br>Symmetry Index            | Gait | [%] | <p>Shank Symbolic Symmetry Index is applied to describe the symmetry of shank movements. The smaller index refers to better symmetry.(1)</p>                                                                                                                                                                                                                                                                                                                        |
| Mean Phase<br>Difference                    | Gait | [%] | <p>Can be applied to describe the coordination of the lower limbs. The lower the value means better symmetry. (2)</p>                                                                                                                                                                                                                                                                                                                                               |
| Phase<br>Coordination<br>Index              | Gait | [%] | <p>Can be applied to describe the coordination of the lower limbs. The lower the value means better coordination. (3)</p>                                                                                                                                                                                                                                                                                                                                           |

#### **Trunk and lumbar related parameters**

|                                |      |       |                                                                                                                                                                                                                                                                                                                                                                                                                                                                              |
|--------------------------------|------|-------|------------------------------------------------------------------------------------------------------------------------------------------------------------------------------------------------------------------------------------------------------------------------------------------------------------------------------------------------------------------------------------------------------------------------------------------------------------------------------|
| Trunk Coronal<br>Peak Velocity | Gait | [°/s] | <p>The coronal projection of the trunk maximum angular velocity in a Gait Cycle.<br/> <math>TrunkCorPeakVel = \text{max}(\text{abs}(front\_gyr\_x(t1:t5)))</math></p> <p>abs : Get the absolute value<br/> max : Find the maximum value<br/> <i>TrunkCorPeakVel</i> : Trunk Coronal Peak Velocity<br/> <i>front_gyr_x</i> : The output of the x-axis of the chest gyroscope(°/s)<br/> <i>t1</i> and <i>t5</i> are the start and end time of each gait cycle respectively</p> |
|--------------------------------|------|-------|------------------------------------------------------------------------------------------------------------------------------------------------------------------------------------------------------------------------------------------------------------------------------------------------------------------------------------------------------------------------------------------------------------------------------------------------------------------------------|

|                     |            |      |       |                                                                                                                                                                                                                                                                                                                                                                                                                                                                                                                           |
|---------------------|------------|------|-------|---------------------------------------------------------------------------------------------------------------------------------------------------------------------------------------------------------------------------------------------------------------------------------------------------------------------------------------------------------------------------------------------------------------------------------------------------------------------------------------------------------------------------|
| Trunk RoM           | Coronal    | Gait | [°]   | <p>The range of motion of the trunk in left-right plane.<br/> <math>TrunkCorRom = TrunkCorMax - TrunkCorMin</math><br/> <math>TrunkCorMax</math> : Maximum value of trunk right tilt angle<br/> <math>TrunkCorMin</math> : Maximum value of trunk left tilt angle<br/> <math>TrunkCorRom</math> : Trunk Coronal RoM</p>                                                                                                                                                                                                   |
| Trunk Peak Velocity | Sagittal   | Gait | [°/s] | <p>The sagittal projection of the trunk maximum angular velocity in a Gait Cycle.<br/> <math>TrunkSagPeakVel = \max(\text{abs}(front\_gyr\_y(t1:t5)))</math><br/>           abs : Get the absolute value<br/>           max : Find the maximum value<br/> <math>TrunkSagPeakVel</math> : Trunk Sagittal Peak Velocity<br/> <math>front\_gyr\_y</math> : The output of the y-axis of the chest gyroscope<br/> <math>t1</math> and <math>t5</math> are the start and end time of each gait cycle respectively</p>           |
| Trunk RoM           | Sagittal   | Gait | [°]   | <p>The range of motion of the trunk in anterior-posterior plane.<br/> <math>TrunkSagRom = TrunkSagMax - TrunkSagMin</math><br/> <math>TrunkSagMax</math> : Maximum trunk backward tilt angle<br/> <math>TrunkSagMin</math> : Maximum trunk forward tilt angle<br/> <math>TrunkSagRom</math> : Trunk Sagittal RoM</p>                                                                                                                                                                                                      |
| Trunk Peak Velocity | Transverse | Gait | [°/s] | <p>The transverse projection of the trunk maximum angular velocity in a Gait Cycle.<br/> <math>TrunkTraPeakVel = \max(\text{abs}(front\_gyr\_z(t1:t5)))</math><br/>           abs : Get the absolute value<br/>           max : Find the maximum value<br/> <math>TrunkTraPeakVel</math> : Trunk Transverse Peak Velocity<br/> <math>front\_gyr\_z</math> : The output of the z-axis of the chest gyroscope(°/s),<br/> <math>t1</math> and <math>t5</math> are the start and end time of each gait cycle respectively</p> |

|                         |            |      |       |                                                                                                                                                                                                                                                                                                                                                                                                                                                                                                                                  |
|-------------------------|------------|------|-------|----------------------------------------------------------------------------------------------------------------------------------------------------------------------------------------------------------------------------------------------------------------------------------------------------------------------------------------------------------------------------------------------------------------------------------------------------------------------------------------------------------------------------------|
| Trunk<br>RoM            | Transverse | Gait | [°]   | <p>The range of motion of the trunk in transverse plane.<br/> <math>TrunkTraRom = TrunkTraMax - TrunkTraMin</math><br/> <math>TrunkTraMax</math> : Maximum angle of trunk right rotation<br/> <math>TrunkTraMin</math> : Maximum angle of trunk left rotation<br/> <math>TrunkTraRom</math> : Trunk Transverse RoM</p>                                                                                                                                                                                                           |
| Lumbar<br>Peak Velocity | Coronal    | Gait | [°/s] | <p>The coronal projection of the lumbar maximum angular velocity in a Gait Cycle.<br/> <math>LumbarCorPeakVel = \max(\text{abs}(\text{waist\_gry\_x}(t1:t5)))</math><br/>           abs : Get the absolute value<br/>           max : Find the maximum value<br/> <math>LumbarCorPeakVel</math> : Lumbar Coronal Peak Velocity<br/> <math>waist\_gry\_x</math> : The output of the x-axis of the lumbar gyroscope(°/s)<br/> <math>t1</math> and <math>t5</math> are the start and end time of each gait cycle respectively</p>   |
| Lumbar<br>RoM           | Coronal    | Gait | [°]   | <p>The range of motion of the waist in left-right plane.<br/> <math>LumbarCorRom = LumbarCorMax - LumbarCorMin</math><br/> <math>LumbarCorMax</math> : Maximum value of lumbar right tilt angle<br/> <math>LumbarCorMin</math> : Maximum value of lumbar left tilt angle<br/> <math>LumbarCorRom</math> : Lumbar Coronal RoM</p>                                                                                                                                                                                                 |
| Lumbar<br>Peak Velocity | Sagittal   | Gait | [°/s] | <p>The sagittal projection of the lumbar maximum angular velocity in a Gait Cycle.<br/> <math>LumbarSagPeakVel = \max(\text{abs}(\text{waist\_gyr\_y}(t1:t5)))</math><br/>           abs : Get the absolute value<br/>           max : Find the maximum value<br/> <math>LumbarSagPeakVel</math> : Lumbar Sagittal Peak Velocity<br/> <math>waist\_gyr\_y</math> : The output of the y-axis of the lumbar gyroscope(°/s)<br/> <math>t1</math> and <math>t5</math> are the start and end time of each gait cycle respectively</p> |

|                            |          |      |       |                                                                                                                                                                                                                                                                                                                                                                                                                                                                                                                                             |
|----------------------------|----------|------|-------|---------------------------------------------------------------------------------------------------------------------------------------------------------------------------------------------------------------------------------------------------------------------------------------------------------------------------------------------------------------------------------------------------------------------------------------------------------------------------------------------------------------------------------------------|
| Lumbar RoM                 | Sagittal | Gait | [°]   | <p>The range of motion of the waist in anterior-posterior plane.<br/> <math>LumbarSagRom = LumbarSagMax - LumbarSagMin</math><br/> <math>LumbarSagMax</math> : Maximum lumbar backward tilt angle<br/> <math>LumbarSagMin</math> : Maximum lumbar forward tilt angle<br/> <math>LumbarSagRom</math> : Lumbar Sagittal RoM</p>                                                                                                                                                                                                               |
| Lumbar Transverse Velocity | Peak     | Gait | [°/s] | <p>The transverse projection of the lumbar maximum angular velocity in a Gait Cycle.<br/> <math>LumbarTraPeakVel = \max(\text{abs}(waist\_gyr\_z(t1:t5)))</math><br/> <math>\text{abs}</math> : Get the absolute value<br/> <math>\max</math> : Find the maximum value<br/> <math>LumbarTraPeakVel</math> : Lumbar Transverse Peak Velocity<br/> <math>waist\_gyr\_z</math> : The output of the z-axis of the lumbar gyroscope(°/s)<br/> <math>t1</math> and <math>t5</math> are the start and end time of each gait cycle respectively</p> |
| Lumbar Transverse RoM      |          | Gait | [°]   | <p>The range of motion of the waist in transverse plane.<br/> <math>LumbarTraRom = LumbarTraMax - LumbarTraMin</math><br/> <math>LumbarTraMax</math> : Maximum angle of lumbar right rotation<br/> <math>LumbarTraMin</math> : Maximum angle of lumbar left rotation<br/> <math>LumbarTraRom</math> : Lumbar Transverse RoM</p>                                                                                                                                                                                                             |

### Upper body related parameters

|              |      |      |       |                                                                                                                                                                                                                                                                                                                                                                                                                                         |
|--------------|------|------|-------|-----------------------------------------------------------------------------------------------------------------------------------------------------------------------------------------------------------------------------------------------------------------------------------------------------------------------------------------------------------------------------------------------------------------------------------------|
| Arm Velocity | Peak | Gait | [°/s] | <p>The sagittal projection of the unilateral-arm maximum angular velocity in each gait cycle.<br/> <math>ArmPeakVel = \max(\text{arm\_gyr\_norm}(t1:t5))</math><br/> <math>\max</math> : Find the maximum value<br/> <math>ArmPeakVel</math> : Arm Peak Velocity<br/> <math>\text{arm\_gyr\_norm}</math> : arm angular velocity<br/> <math>t1</math> and <math>t5</math> are the start and end time of each gait cycle respectively</p> |
|--------------|------|------|-------|-----------------------------------------------------------------------------------------------------------------------------------------------------------------------------------------------------------------------------------------------------------------------------------------------------------------------------------------------------------------------------------------------------------------------------------------|

|                             |      |     |                                                                                                                                                                                                                                                                                                                                                                                                                                         |
|-----------------------------|------|-----|-----------------------------------------------------------------------------------------------------------------------------------------------------------------------------------------------------------------------------------------------------------------------------------------------------------------------------------------------------------------------------------------------------------------------------------------|
| Arm Forward Swing Maximum   | Gait | [°] | <p>The sagittal projection of the unilateral-arm maximum angle forward in each gait cycle.</p> $ArmRomMax = \max(\text{arm\_pit}(t1:t5))$ <p>max : Find the maximum value<br/> <i>ArmRomMax</i> : Arm Forward Swing Maximum<br/> <i>arm_pit</i> : Pitch angle of arm(°),<br/> <i>t1</i> and <i>t5</i> are the start and end time of each gait cycle respectively</p>                                                                    |
| Arm Backward Swing Maximum  | Gait | [°] | <p>The sagittal projection of the unilateral-arm maximum angle backward in each gait cycle.</p> $ArmRomMax = \min(\text{arm\_pit}(t1:t5))$ <p>min : Find the minimum value<br/> <i>ArmRomMax</i> : Arm Backward Swing Maximum<br/> <i>arm_pit</i> : Pitch angle of arm(°)<br/> <i>t1</i> and <i>t5</i> are the start and end time of each gait cycle respectively</p>                                                                   |
| Arm Velocity Asymmetry      | Gait | [%] | <p>Difference in peak arm swing velocity between the left and right arm divided by the larger value.</p> $ArmSwingVelAsym = \text{abs}(ArmPeak\_L - ArmPeak\_R) / \max([ArmPeak\_L, ArmPeak\_R])$ <p>abs : Get the absolute value<br/> max : Find the maximum value<br/> <i>ArmSwingVelAsym</i> : Arm Velocity Asymmetry<br/> <i>ArmPeak_L</i> : Left arm swing maximum angle<br/> <i>ArmPeak_R</i> : Right arm swing maximum angle</p> |
| Arm Symbolic Symmetry Index | Gait | [%] | <p>Arm Symbolic Symmetry Index is applied to describe the symmetry of arm swings. The smaller index refers to better symmetry. (1)</p>                                                                                                                                                                                                                                                                                                  |

**Postural transitions related parameters**

|                                 |         |       |                                                                                                                                                                                                                                                                                                                                                                                                                                                                 |
|---------------------------------|---------|-------|-----------------------------------------------------------------------------------------------------------------------------------------------------------------------------------------------------------------------------------------------------------------------------------------------------------------------------------------------------------------------------------------------------------------------------------------------------------------|
| Turning - Average Duration      | Turning | [s]   | <p>The duration of the turning process.</p> $Average\_dur = \text{mean}([turn\_dur1 \ turn\_dur2])$ <p>mean : Calculate the average<br/> <i>Average_dur</i> : Turning - Average Duration<br/> <i>turn_dur1</i> : First turn time<br/> <i>turn_dur2</i> : Second turn time</p>                                                                                                                                                                                   |
| Turning - Peak Velocity         | Turning | [°/s] | <p>The maximum achieved angular velocity of trunk rotation in the transverse plane during 180-degree turns.</p> $PeakTurningAngVel = \text{max}(\text{abs}(front\_gyr\_z(ts:te)))$ <p>abs : Get the absolute value<br/> max : Find the maximum value<br/> <i>PeakTurningAngVel</i> : Turning - Peak Velocity<br/> <i>front_gyr_z</i> : The output of the z-axis of the chest gyroscope(°/s)<br/> <i>ts</i> : Turn start time<br/> <i>te</i> : Turn end time</p> |
| Turning - Average Step Duration | Turning | [s]   | <p>Turning Duration divided by Average Steps.</p> $StepTime = turn\_dur / steps$ <p><i>StepTime</i> : Turning - Average Step Duration<br/> <i>turn_dur</i> : Turn duration<br/> <i>steps</i> : The average number of steps in the turning process</p>                                                                                                                                                                                                           |

|                                     |              |        |                                                                                                                                                                                                                                                                                                                                                                                                                                                                                                                                |
|-------------------------------------|--------------|--------|--------------------------------------------------------------------------------------------------------------------------------------------------------------------------------------------------------------------------------------------------------------------------------------------------------------------------------------------------------------------------------------------------------------------------------------------------------------------------------------------------------------------------------|
| Turning - Average Angular Velocity  | Turning      | [°/s]  | <p>The angle of turning divided by the time during which the subject can complete the turning.</p> $\text{MeanTurningAngularVelocity} = \text{turn\_angle} / (\text{te} - \text{ts})$ <p><i>MeanTurningAngularVelocity</i> : Turning - Average Angular Velocity<br/> <i>turn_angle</i>: The angle of turning<br/> <i>ts</i> : Turn start time<br/> <i>te</i> : Turn end time</p>                                                                                                                                               |
| Turning - Average Steps             | Turning      | [step] | <p>The count of the steps during turning.</p> $\text{Average\_steps} = \text{mean}([\text{turn\_step1} \text{turn\_step2}])$ <p><i>mean</i> : Calculate the average<br/> <i>Average_steps</i> : Turning - Average Steps<br/> <i>turn_step1</i> : First turn step count<br/> <i>turn_step2</i> : Second turn step count</p>                                                                                                                                                                                                     |
| SiSt - Duration                     | Sit-to-Stand | [s]    | <p>The duration of the sit-to-stand process.</p> $\text{sist\_dur} = \text{sist\_e} - \text{sist\_s}$ <p><i>sist_dur</i>: SiSt - Average Duration<br/> <i>sist_s</i>: Stand up start time<br/> <i>sist_e</i>: Stand up end time</p>                                                                                                                                                                                                                                                                                            |
| SiSt - Trunk Sagittal Peak Velocity | Sit-to-Stand | [°/s]  | <p>The maximum angular velocity of trunk in anterior-posterior plane during the sit-to-stand process.</p> $\text{TrunkSagPeakVel} = \max(\text{abs}(\text{front\_gyr\_y}(\text{sist\_s}:\text{sist\_e})))$ <p><i>abs</i> : Get the absolute value<br/> <i>max</i> : Find the maximum value<br/> <i>TrunkSagPeakVel</i> : SiSt - Trunk Sagittal Peak Velocity<br/> <i>front_gyr_y</i>: The output of the y-axis of the chest gyroscope(°/s)<br/> <i>sist_s</i> : Stand up start time<br/> <i>sist_e</i> : Stand up end time</p> |

|                                          |              |     |                                                                                                                                                                                                                                                                                                                                                                              |
|------------------------------------------|--------------|-----|------------------------------------------------------------------------------------------------------------------------------------------------------------------------------------------------------------------------------------------------------------------------------------------------------------------------------------------------------------------------------|
| SiSt - Trunk Lean<br>Backward<br>Maximum | Sit-to-Stand | [°] | <p>The maximum backward-angle during the sit-to-stand process.<br/> <math>TrunkSagMax = \max(front\_pit(sist\_s:sist\_e))</math><br/> max : Find the maximum value<br/> <math>TrunkSagMax</math> : SiSt - Trunk Lean Backward Maximum<br/> <i>front_pit</i> : Pitch of chest node(°)<br/> <i>sist_s</i> : Stand up start time<br/> <i>sist_e</i> : Stand up end time</p>     |
| SiSt - Trunk Lean<br>Forward<br>Maximum  | Sit-to-Stand | [°] | <p>The maximum forward-angle during the sit-to-stand process.<br/> <math>TrunkSagMax = \min(front\_pit(sist\_s:sist\_e))</math><br/> min : Find the minimum value<br/> <math>TrunkSagMax</math> : SiSt - Trunk Lean Forward Maximum<br/> <i>front_pit</i> : Pitch angle of chest node(°)<br/> <i>sist_s</i> : Stand up start time<br/> <i>sist_e</i> : Stand up end time</p> |
| StSi - Duration                          | Stand-to-Sit | [s] | <p>The duration of the stand-to-sit process.<br/> <math>stsi\_dur = stsi\_e - stsi\_s</math><br/> <i>stsi_dur</i>: SiSt - Average Duration<br/> <i>stsi_s</i>: Sit down start time<br/> <i>stsi_e</i>: Sit down end time</p>                                                                                                                                                 |



|                                           |              |       |                                                                                                                                                                                                                                                                                                                                                                                                                                                                     |
|-------------------------------------------|--------------|-------|---------------------------------------------------------------------------------------------------------------------------------------------------------------------------------------------------------------------------------------------------------------------------------------------------------------------------------------------------------------------------------------------------------------------------------------------------------------------|
| StSi - Trunk<br>Sagittal Peak<br>Velocity | Stand-to-Sit | [°/s] | <p>The maximum angular velocity of trunk in anterior-posterior plane during the stand-to-sit process.<br/> <math>TrunkSagiPeakVel = \max(\text{abs}(front\_gyr\_y(stsi\_s:stsi\_e)))</math><br/> max : Find the maximum value<br/> <i>TrunkSagiPeakVel</i> : StSi - Trunk Sagittal Peak Velocity<br/> <i>front_gyr_y</i> : The output of the y-axis of the chest gyroscope(°/s)<br/> <i>stsi_s</i> : Sit down start time<br/> <i>stsi_e</i> : Sit down end time</p> |
| StSi - Trunk Lean<br>Backward<br>Maximum  | Stand-to-Sit | [°]   | <p>The maximum backward-angle during the stand-to-sit process.<br/> <math>TrunkSagRoMMax = \max(front\_pit(stsi\_s:stsi\_e))</math><br/> max : Find the maximum value<br/> <i>TrunkSagRoMMax</i> : StSi - Trunk Lean Backward Maximum<br/> <i>front_pit</i> : Pitch angle of chest node(°),<br/> <i>stsi_s</i> : Sit down start time<br/> <i>stsi_e</i> : Sit down end time</p>                                                                                     |
| StSi - Trunk Lean<br>Forward<br>Maximum   | Stand-to-Sit | [°]   | <p>The maximum forward-angle during the stand-to-sit process.<br/> <math>TrunkSagRoMMin = \min(front\_pit(stsi\_s:stsi\_e))</math><br/> min : Find the minimum value<br/> <i>TrunkSagRoMMin</i> : StSi - Trunk Lean Forward Maximum<br/> <i>front_pit</i> : Pitch angle of chest node(°)<br/> <i>stsi_s</i> : Sit down start time<br/> <i>stsi_e</i> : Sit down end time</p>                                                                                        |

---

cm, centimeter; m, meter; s, second; min, minute; %, percent; °, degree.

RoM, range of motion; SiSt, sit to stand; StSi, stand to sit.

## Supplementary References

1. Sant'Anna A, Salarian A, Wickström N. A new measure of movement symmetry in early Parkinson's disease patients using symbolic processing of inertial sensor data. *IEEE Trans Biomed Eng.* Jul 2011;58(7):2127-2135. doi:10.1109/tbme.2011.2149521
2. Zivotofsky AZ, Gruendlinger L, Hausdorff JM. Modality-specific communication enabling gait synchronization during over-ground side-by-side walking. *Hum Mov Sci.* Oct 2012;31(5):1268-1285. doi:10.1016/j.humov.2012.01.003
3. Plotnik M, Giladi N, Hausdorff JM. A new measure for quantifying the bilateral coordination of human gait: effects of aging and Parkinson's disease. *Exp Brain Res.* Aug 2007;181(4):561-570. doi:10.1007/s00221-007-0955-7
